# Supplementary material for: Tailoring the Size and Shape—New Path for Ammonium Metavanadate Synthesis
Source: Materials (Basel). 2019 Oct 21;12(20):3446. doi: 10.3390/ma12203446 (PMC6829540; doi:10.3390/ma12203446)
Supplement: Supplementary file 1 [file materials-12-03446-s001.pdf]

Article

# Tailoring the Size and Shape—New Path for Ammonium Metavanadate Synthesis

Marta Przeźniak-Welenc \*, Małgorzata Nadolska, Barbara Kościelska and Kamila Sadowska

Faculty of Applied Physics and Mathematics, Gdansk University of Technology, Narutowicza 11/12, 80-233 Gdansk, Poland; malgorzata.nadolska@pg.edu.pl (M.N.); barkosci@pg.edu.pl (B.K.); kamsadow@pg.edu.pl (K.S.)

\* Correspondence: marta.welenc@pg.edu.pl; Tel: +48 583486606

Received: 23 September 2019; Accepted: 17 October 2019; Published: 21 October 2019

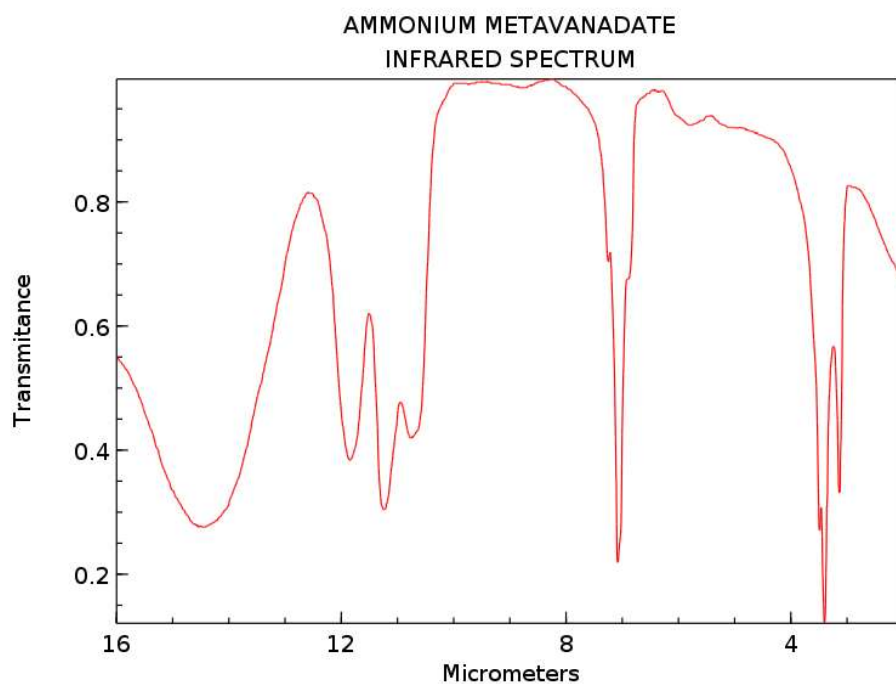

Figure S1. FTIR spectrum of ammonium metavanadate [1].

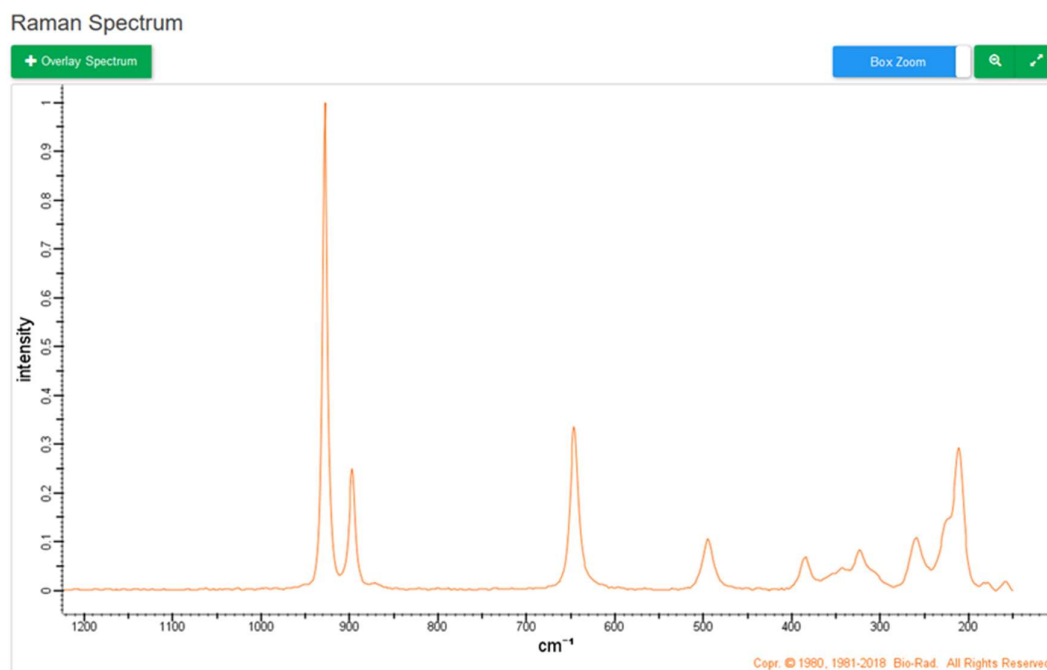

**Figure S2.** Raman spectrum of ammonium metavanadate.

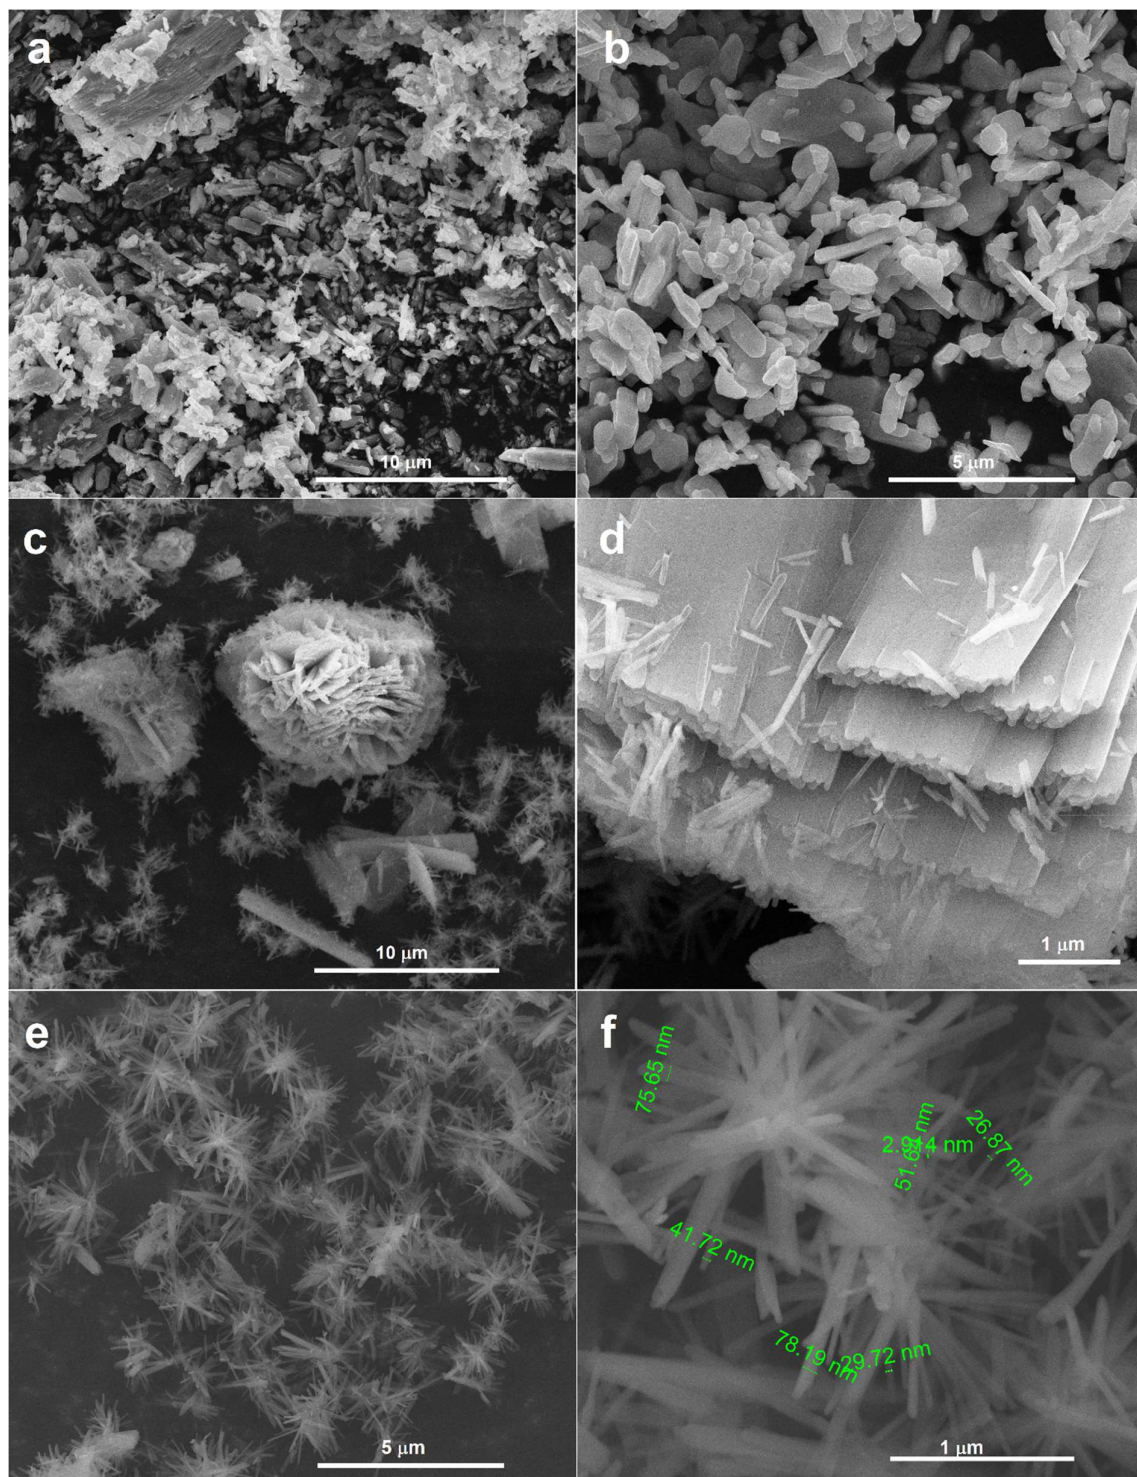

**Figure S3.** SEM images presenting the structure of  $V_2O_5$  used as a precursor (a,b) and intermediates formed in the reaction of  $V_2O_5$  with ammonium formate in formamide (c,d), leading to flower-like nanostructural crystals of  $NH_4VO_3$  (e,f).

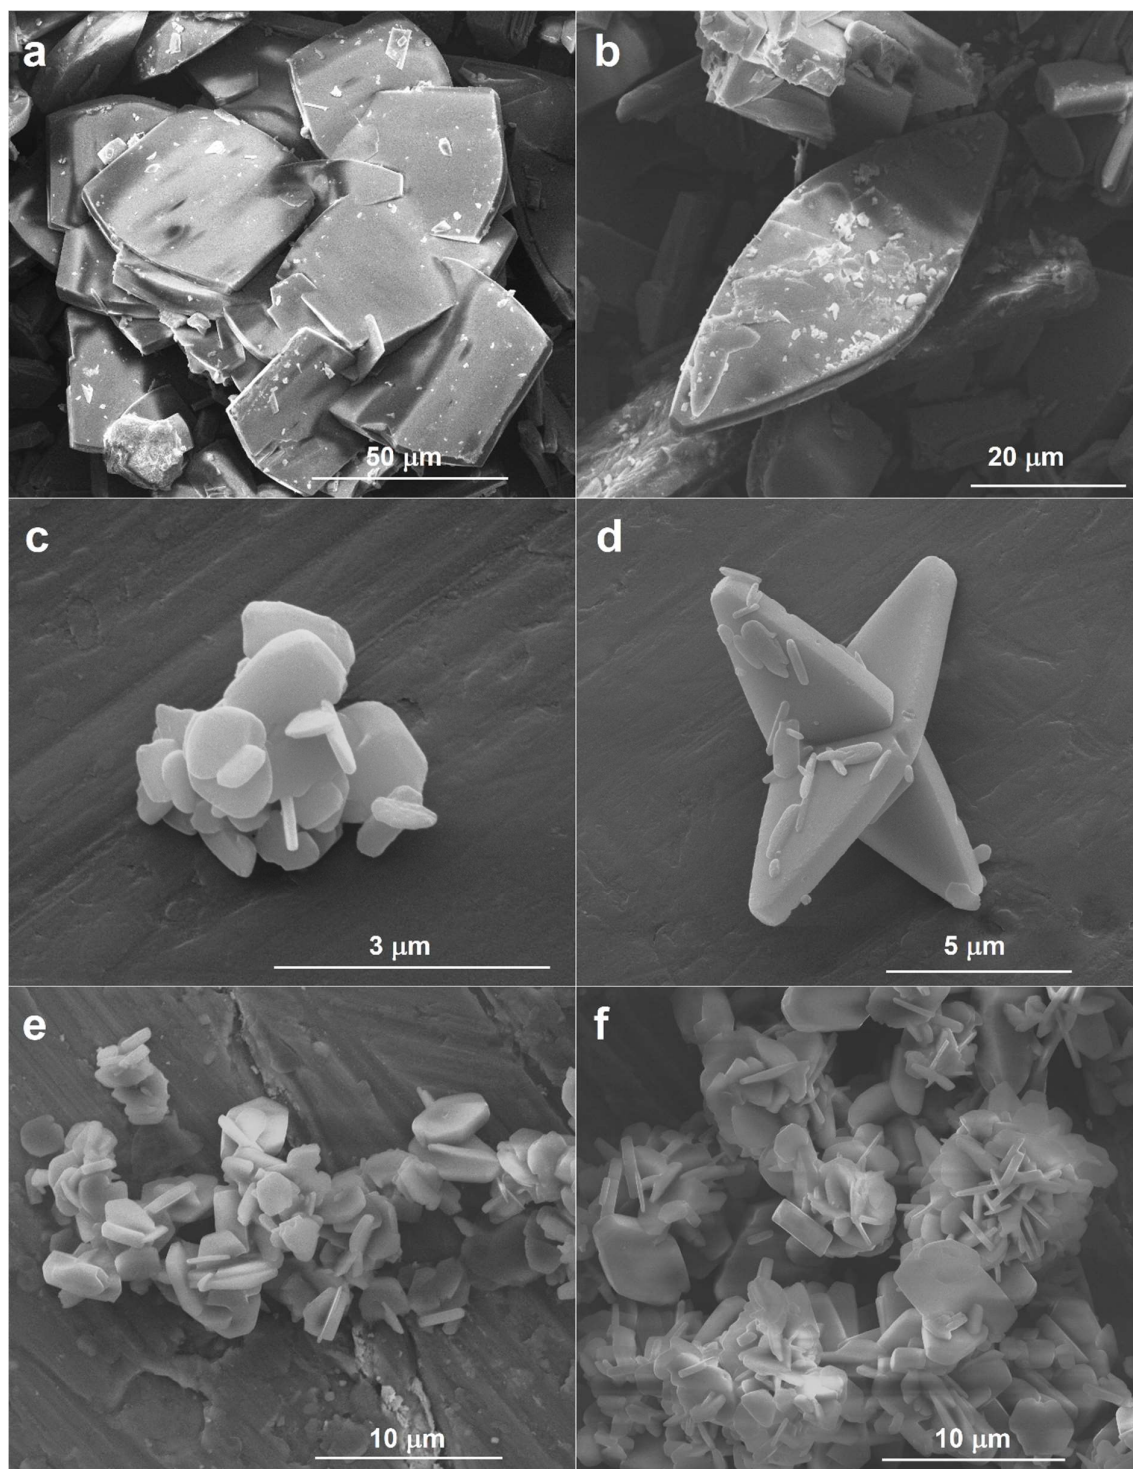

**Figure S4.** SEM images presenting structures of  $\text{NH}_4\text{VO}_3$  obtained from  $\text{V}_2\text{O}_5$  in water using ammonium formate (a,b), ammonium acetate (c,d), and equimolar mixture of ammonium formate and ammonium acetate (e,f).

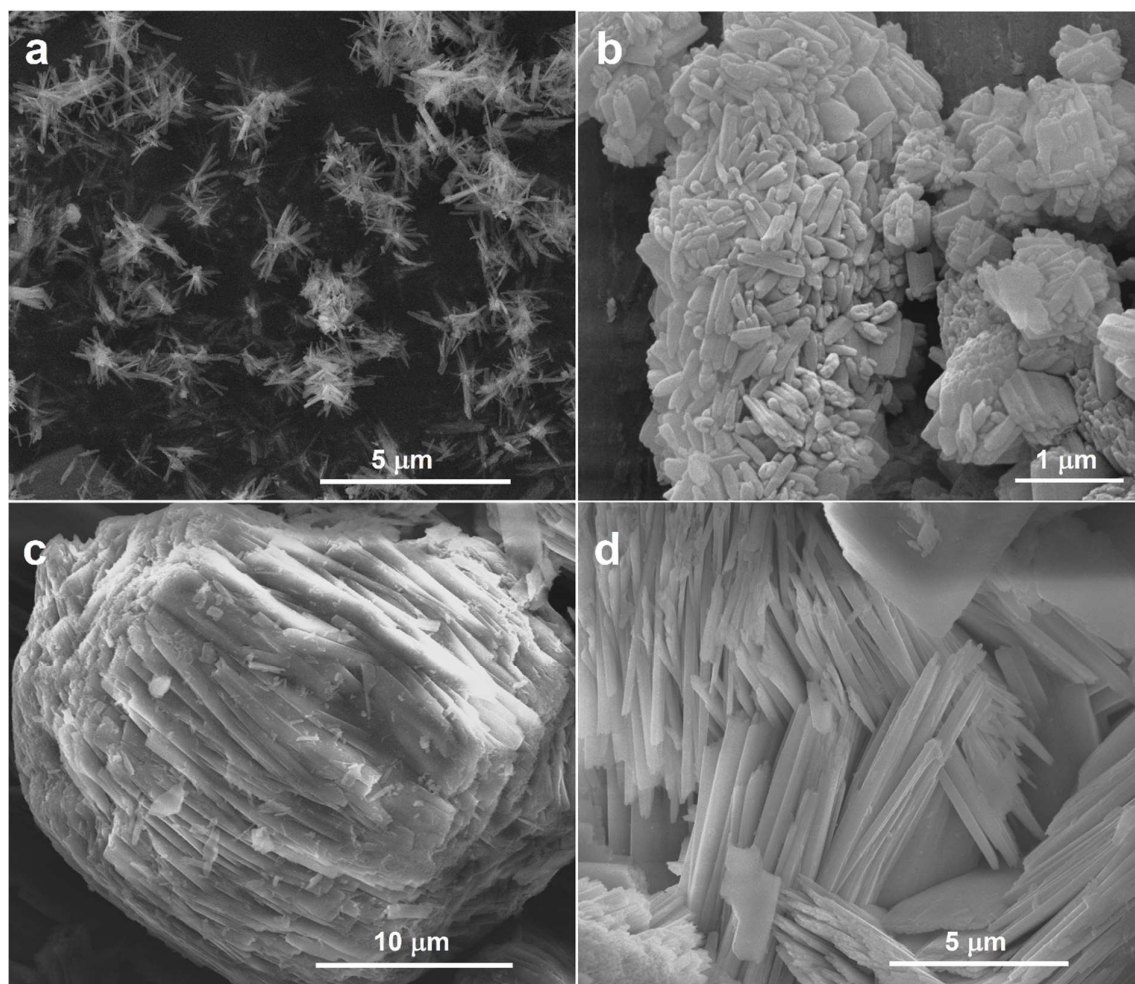

**Figure S5.** SEM images presenting structures of  $\text{NH}_4\text{VO}_3$  obtained from  $\text{V}_2\text{O}_5$  in formamide using ammonium formate (a), ammonium acetate (b), and equimolar mixture of ammonium formate and ammonium acetate (c,d).

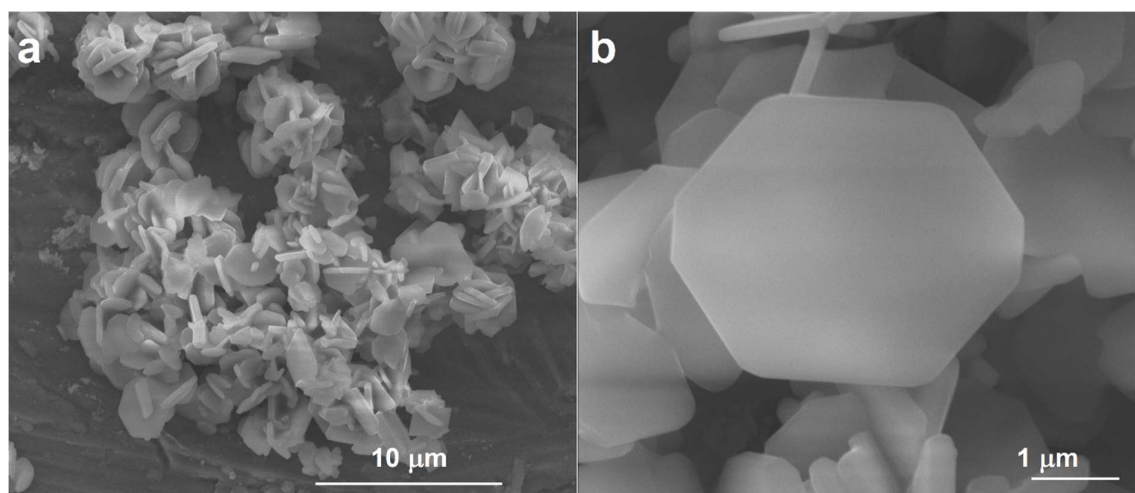

**Figure S6.** SEM images presenting structures of  $\text{NH}_4\text{VO}_3$  obtained in the reaction of  $\text{V}_2\text{O}_5$  and ammonium formate carried out in the 1:1 (v/v) mixture of water and formamide.

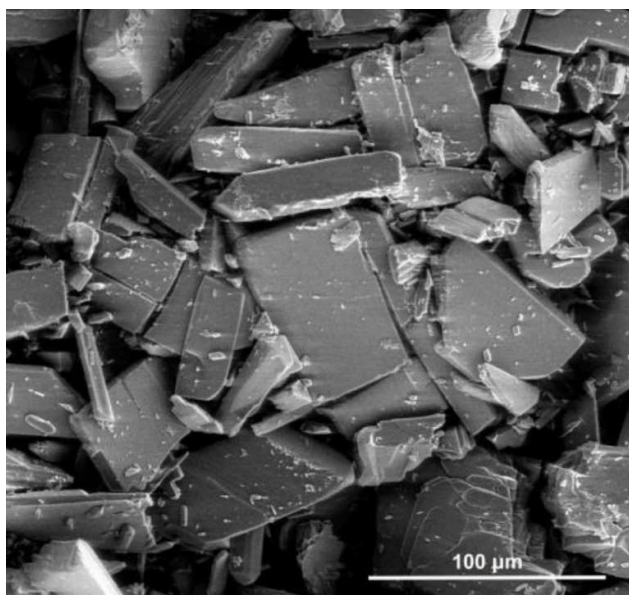

**Figure S7.** SEM image of commercial  $\text{NH}_4\text{VO}_3$  used in a hydrothermal synthesis.

#### References:

1. NIST Chemistry WebBook; Available online: <https://webbook.nist.gov/chemistry> (accessed on 27 July 2019).

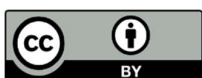

© 2019 by the authors. Submitted for possible open access publication under the terms and conditions of the Creative Commons Attribution (CC BY) license (<http://creativecommons.org/licenses/by/4.0/>).
